# Supplementary material for: Synthesis and characterization of a new mid-infrared transparent compound: acentric Ba5In4Te4S7
Source: Royal Society of Chemistry journal article supplement (doi:10.1039/c5dt00228a), 2015-01-01
Supplement: c5dt00228a2.pdf [file c5dt00228a2.pdf]

# Synthesis and Characterization of a New Mid-Infrared Transparency Compound: Acentric $\text{Ba}_5\text{In}_4\text{Te}_4\text{S}_7$

De-Ming Tan<sup>a,b</sup>, Chen-Sheng Lin<sup>a</sup>, Zhong-Zhen Luo<sup>a</sup>, Hao Zhang<sup>a</sup>, Wei-Long Zhang<sup>c</sup>,  
Zhang-Zhen He<sup>a</sup>, and Wen-Dan Cheng<sup>\*a</sup>

<sup>a</sup>State Key Laboratory of Structural Chemistry, Fujian Institute of Research on the  
Structure of Matter, Chinese Academy of Sciences, Fuzhou 350002, P. R. China

<sup>b</sup>University of Chinese Academy of Sciences, Beijing, 100039, P. R. China.

<sup>c</sup>College of Electronics and Information Science, Fujian Jiangxia University, Fuzhou  
350108, P.R. China.

E-mail: [cwd@fjirsm.ac.cn](mailto:cwd@fjirsm.ac.cn)

## Supporting Information

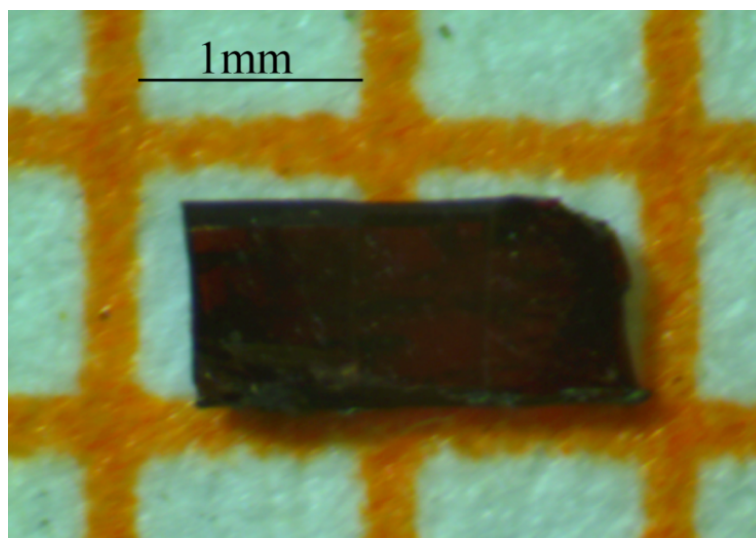

**Fig. S1** Photograph of crystal for  $\text{Ba}_5\text{In}_4\text{Te}_4\text{S}_7$ .

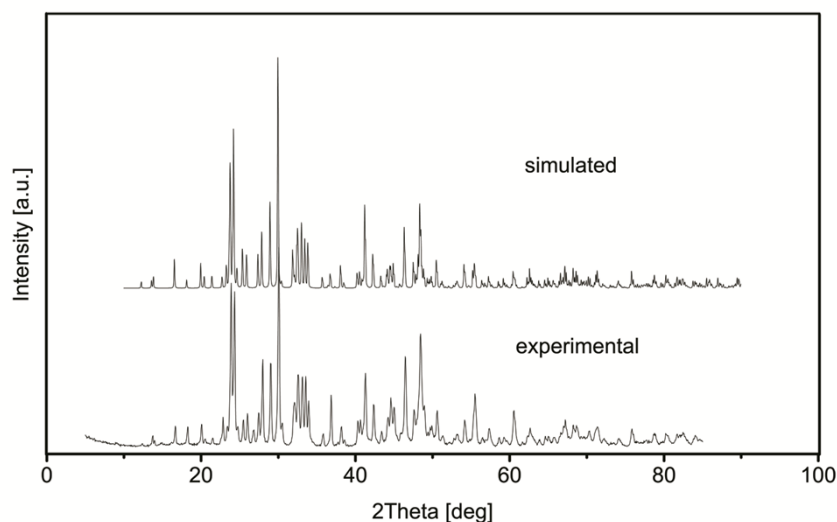

**Fig. S2** Experimented (lower) and simulated (upper) X-ray ( $\lambda=1.5418 \text{ \AA}$ ) diffraction patterns

for Ba<sub>5</sub>In<sub>4</sub>Te<sub>4</sub>S<sub>7</sub>.

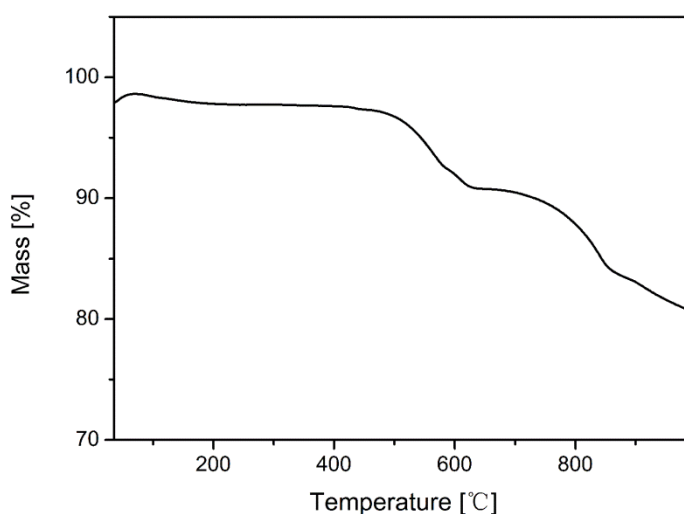

**Fig. S3** TGA of Ba<sub>5</sub>In<sub>4</sub>Te<sub>4</sub>S<sub>7</sub> in flowing N<sub>2</sub> atmosphere.

**Table S1** Atomic coordinates and equivalent isotropic displacement parameters (Å<sup>2</sup>) for Ba<sub>5</sub>In<sub>4</sub>Te<sub>4</sub>S<sub>7</sub>

|       | x         | y      | z         | U(eq)    |
|-------|-----------|--------|-----------|----------|
| Ba(1) | 1         | 1      | 0.8420(1) | 0.023(1) |
| Ba(2) | 0.8149(1) | 1      | 0.4940(1) | 0.015(1) |
| Ba(3) | 0.8859(1) | 1      | 0.9941(1) | 0.014(1) |
| In(1) | 0.9457(1) | 0.5000 | 0.3558(1) | 0.014(1) |
| In(2) | 0.8017(1) | 0.5000 | 0.9749(1) | 0.014(1) |
| Te(1) | 0.9109(1) | 1      | 0.4974(1) | 0.016(1) |
| Te(2) | 0.7595(1) | 1      | 0.9157(1) | 0.020(1) |
| S(1)  | 1         | 0.5000 | 0.5256(4) | 0.019(1) |
| S(2)  | 0.9477(1) | 0.5000 | 0.0161(2) | 0.004(1) |
| S(3)  | 0.8486(1) | 0.5000 | 0.7415(3) | 0.014(1) |
| S(4)  | 0.8414(1) | 0.5000 | 1.2277(3) | 0.015(1) |

**Table S2** Selected bond lengths [Å] and angles (deg) for Ba<sub>5</sub>In<sub>4</sub>Te<sub>4</sub>S<sub>7</sub>.

|              |            |                   |             |
|--------------|------------|-------------------|-------------|
| Ba(1)-S(1)   | 3.192(2)   | S(1)-Ba(1)-S(1)#1 | 86.54(8)    |
| Ba(1)-S(2)#2 | 3.2557(13) | S(1)-Ba(1)-S(2)#2 | 79.94(4)    |
| Ba(2)-Te(1)  | 3.7559(7)  | S(3)-Ba(2)-Te(1)  | 66.30(4)    |
| Ba(2)-Te(2)  | 3.7801(9)  | Te(1)-Ba(2)-Te(2) | 124.59(2)   |
| In(1)-S(1)   | 2.4631(17) | S(1)-In(1)-S(2)   | 118.58(8)   |
| In(1)-S(2)   | 2.496(2)   | S(1)-In(1)-Te(1)  | 103.46(4)   |
| In(1)-Te(1)  | 2.7791(5)  | S(2)-In(1)-Te(1)  | 112.95(3)   |
| In(2)-Te(2)  | 2.7759(5)  | S(3)-In(2)-Te(2)  | 108.37(4)   |
| Ba(3)-In(2)  | 3.9566(6)  | S(3)-Ba(3)-In(2)  | 38.17(4)    |
| Ba(1)-Ba(3)  | 4.5999(6)  | S(1)-Ba(1)-Ba(3)  | 100.183(11) |

Symmetry transformations used to generate equivalent atoms:

#1 x,y+1,z    #2 x,y,z+1
